# Supplementary material for: Distinct mechanisms of inhibition of Kv2 potassium channels by tetraethylammonium and RY785
Source: PubMed Central journal article supplement (PMC11451595; doi:10.1101/2024.07.25.605170), 2024-07-25
Supplement: media-1.pdf [file media-1.pdf]

**Distinct mechanisms of inhibition of Kv2 potassium channels  
by tetraethylammonium and RY785**

**Supplementary Information**

Shan Zhang<sup>1</sup>, Robyn Stix<sup>1,2</sup>, Esam A. Orabi<sup>1</sup>, Nathan Bernhardt<sup>1</sup>, José D. Faraldo-Gómez<sup>1\*</sup>

<sup>1</sup>Theoretical Molecular Biophysics Laboratory,  
National Heart, Lung and Blood Institute,  
National Institutes of Health, Bethesda, MD

<sup>2</sup>Molecular and Cell Biology Graduate Program,  
Johns Hopkins University, Baltimore, MD

\*Correspondence should be addressed to: [jose.faraldo@nih.gov](mailto:jose.faraldo@nih.gov)

July 25<sup>th</sup>, 2024

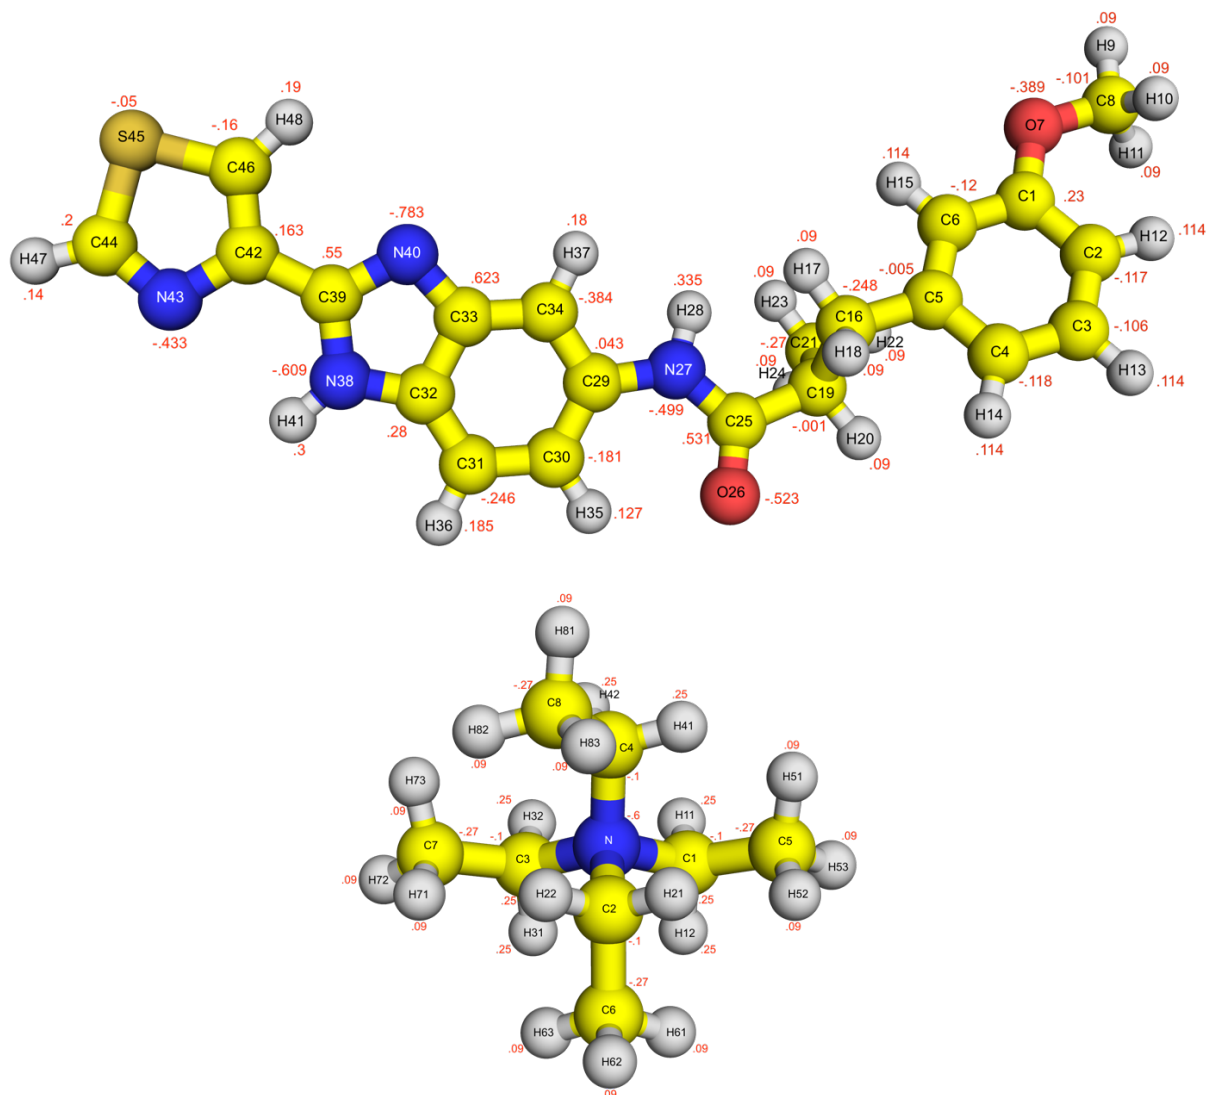

**Figure S1.** Chemical structures of RY785 and tetraethylammonium. Atom names and partial electronic charges are indicated.

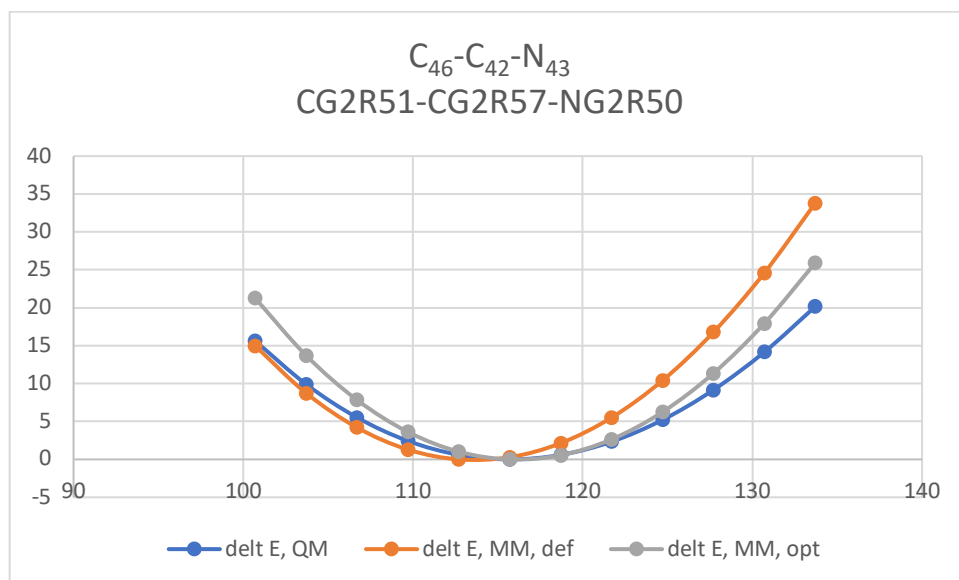

**Figure S2.** Potential-energy curve for the  $C_{46}C_{42}N_{43}$  angle between  $100^\circ$  and  $135^\circ$ , calculated with MP2/6-31G(d) (blue) and with default CGengFF (orange) or with our optimized forcefield (gray). The Y axis shows the energy (in kcal/mol) relative to the lowest-energy conformer.

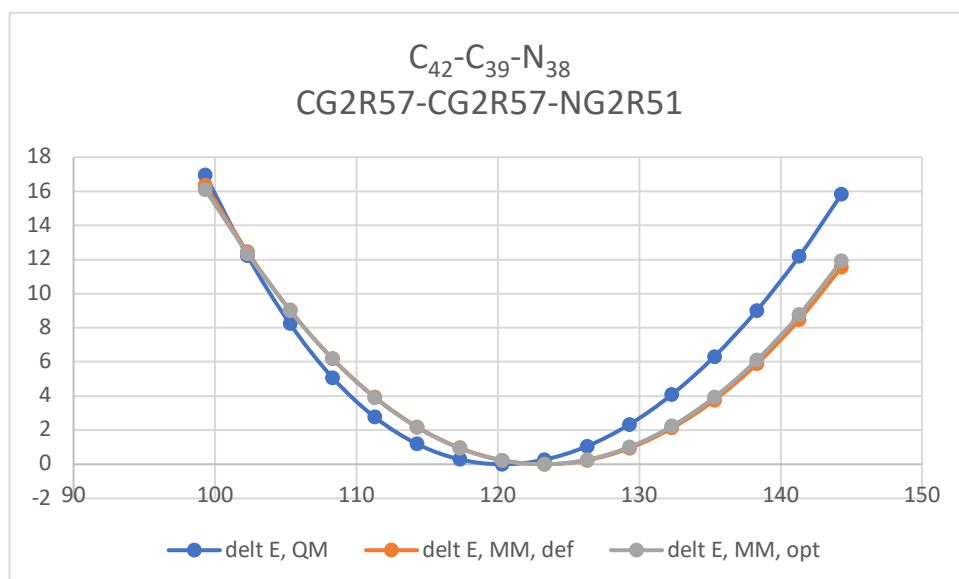

**Figure S3.** Potential-energy curve for the  $C_{42}C_{39}N_{38}$  angle between  $90^\circ$  and  $145^\circ$ , calculated with MP2/6-31G(d) (blue) and with default CGengFF (orange) or with our optimized forcefield (gray). The Y axis shows the energy (in kcal/mol) relative to the lowest-energy conformer.

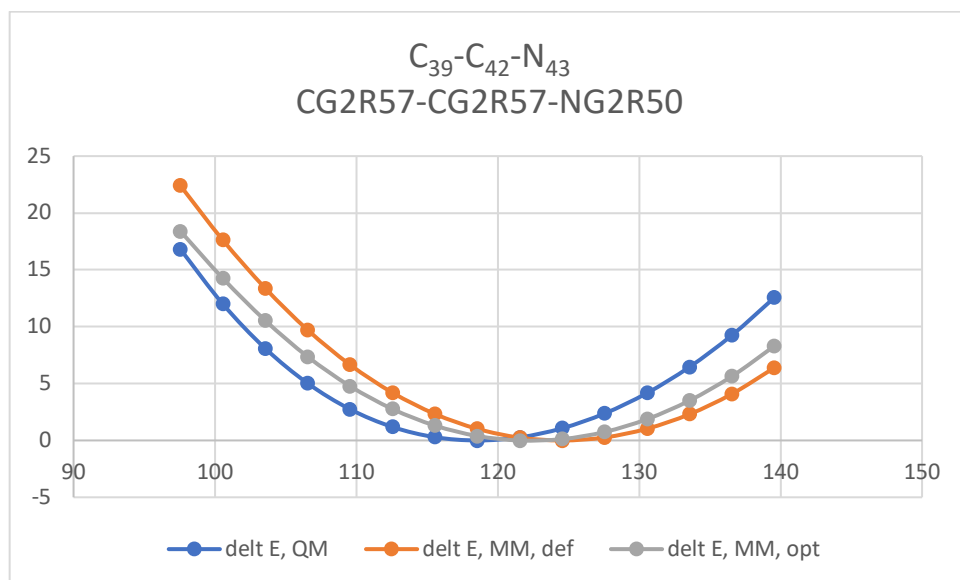

**Figure S4.** Potential-energy curve for the  $C_{39}C_{42}N_{43}$  angle between  $95^\circ$  and  $140^\circ$ , calculated with MP2/6-31G(d) (blue) and with default CGengFF (orange) or with our optimized forcefield (gray). The Y axis shows the energy (in kcal/mol) relative to the lowest-energy conformer.

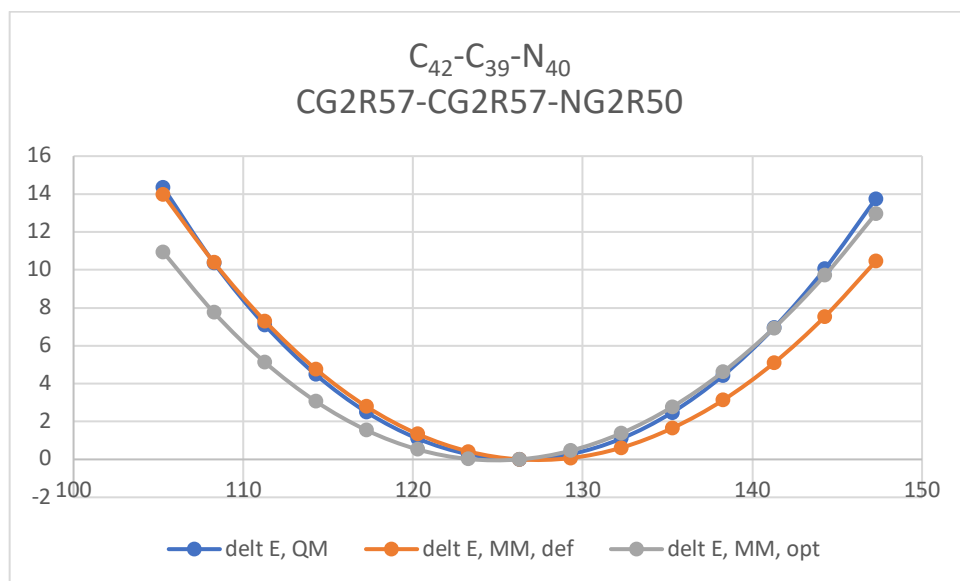

**Figure S5.** Potential-energy curve for  $C_{42}C_{39}N_{40}$  angle between  $105^\circ$  and  $150^\circ$ , calculated with MP2/6-31G(d) (blue) and with default CGengFF (orange) or with our optimized forcefield (gray). The Y axis shows the energy (in kcal/mol) relative to the lowest-energy conformer.

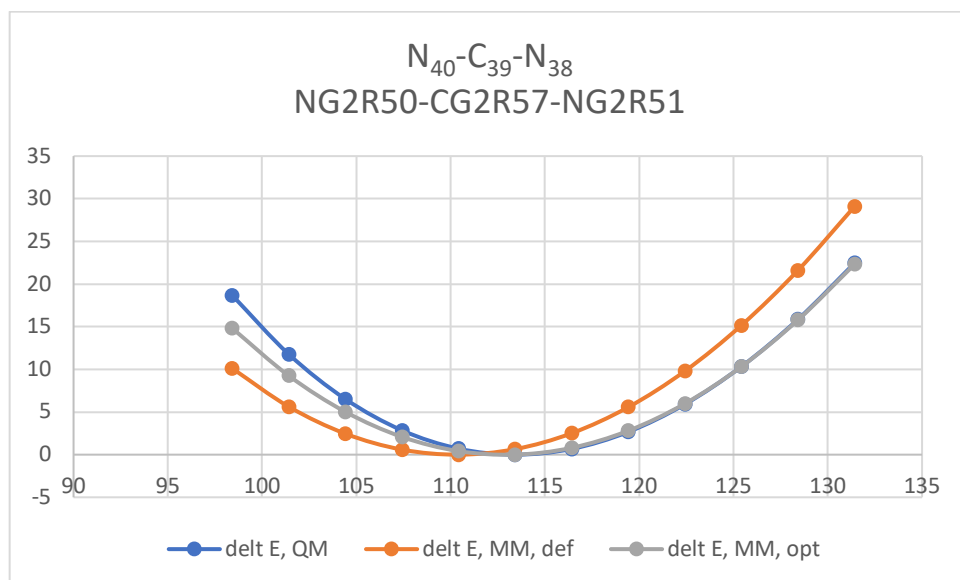

**Figure S6.** Potential-energy curve for the  $N_{40}C_{39}N_{38}$  angle between  $95^\circ$  and  $135^\circ$ , calculated with MP2/6-31G(d) (blue) and with default CGengFF (orange) or with our optimized forcefield (gray). The Y axis shows the energy (in kcal/mol) relative to the lowest-energy conformer.

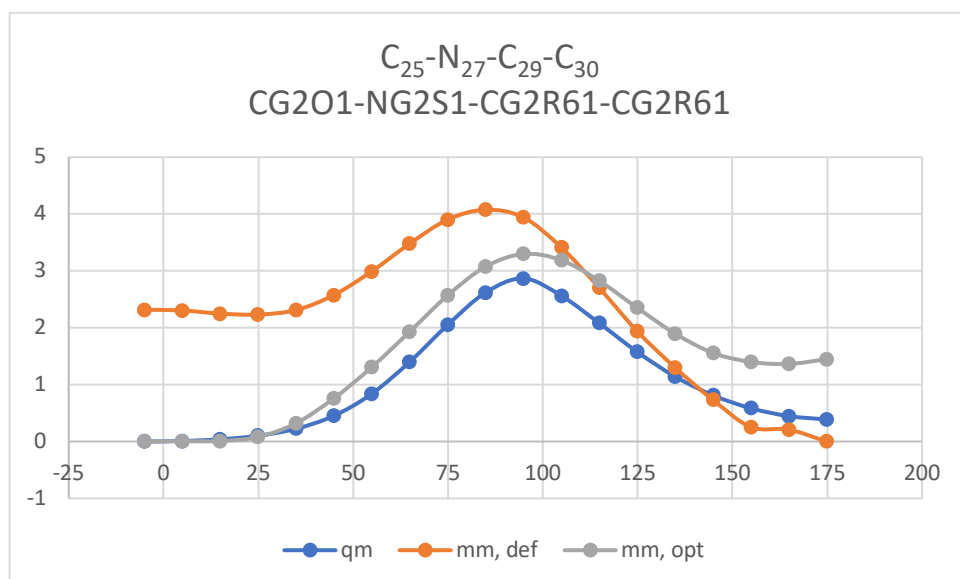

**Figure S7.** Potential-energy curve for the  $C_{25}N_{27}C_{29}C_{30}$  angle between  $0^\circ$  and  $180^\circ$ , calculated with MP2/6-31G(d) (blue) and with default CGengFF (orange) or with our optimized forcefield (gray). The Y axis shows the energy (in kcal/mol) relative to the lowest-energy conformer.

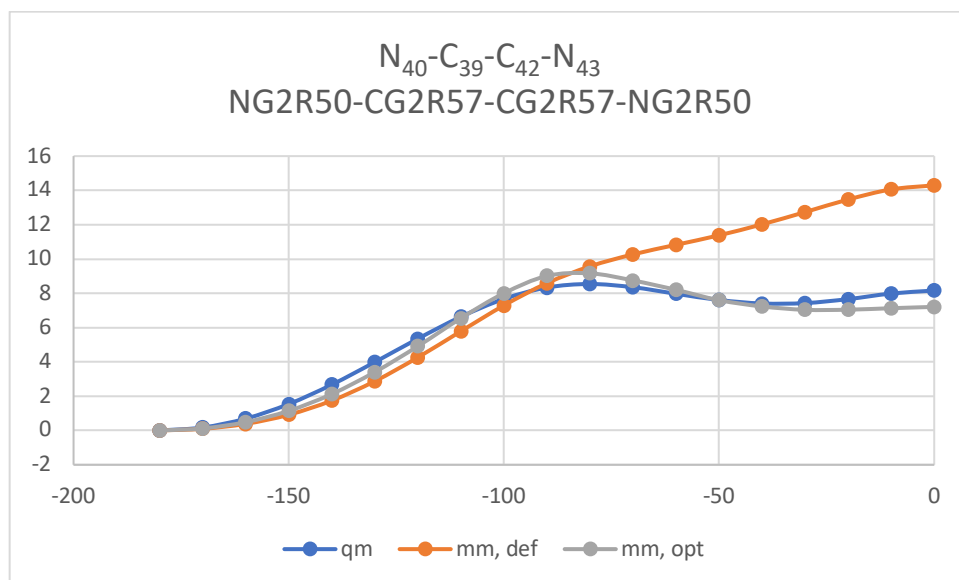

**Figure S8.** Potential-energy curve for the  $N_{40}C_{39}C_{42}N_{43}$  angle between  $-200^\circ$  and  $0^\circ$ , calculated with MP2/6-31G(d) (blue) and with default CGengFF (orange) or with our optimized forcefield (gray). The Y axis shows the energy (in kcal/mol) relative to the lowest-energy conformer.

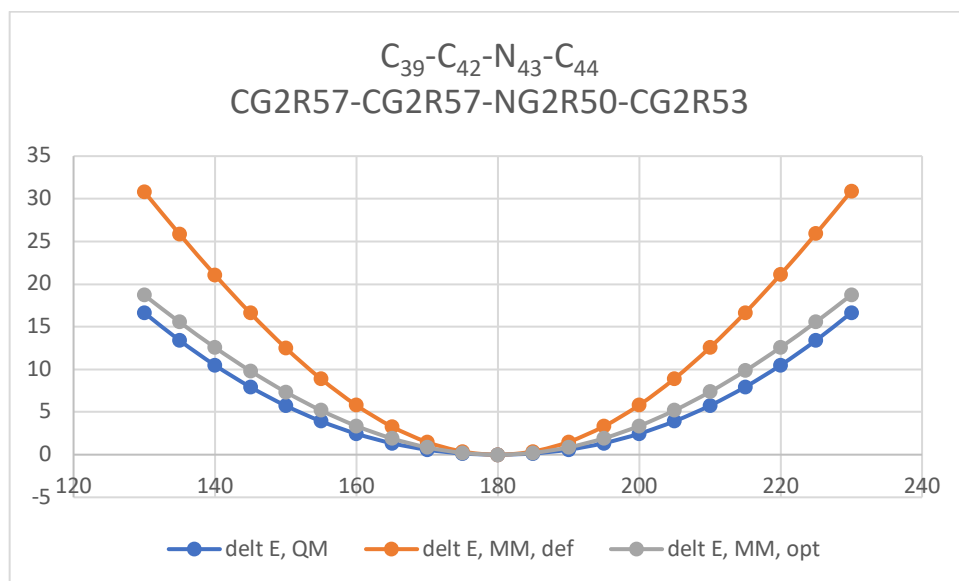

**Figure S9.** Potential-energy curve for the  $C_{39}C_{42}N_{43}C_{44}$  angle between  $120^\circ$  and  $240^\circ$ , calculated with MP2/6-31G(d) (blue) and with default CGengFF (orange) or with our optimized forcefield (gray). The Y axis shows the energy (in kcal/mol) relative to the lowest-energy conformer.

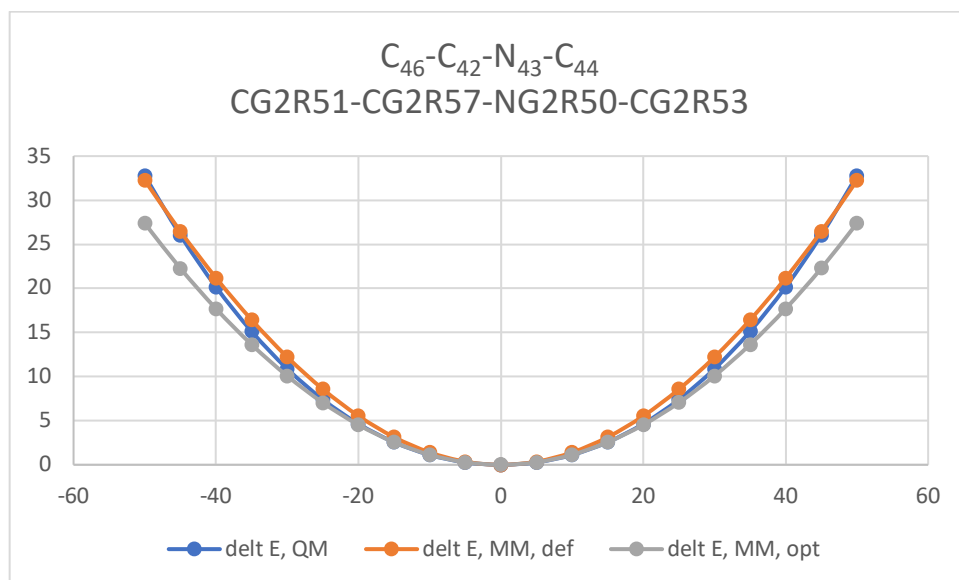

**Figure S10.** Potential-energy curve for the  $C_{46}C_{42}N_{43}C_{44}$  angle between  $-60^\circ$  and  $60^\circ$ , calculated with MP2/6-31G(d) (blue) and with default CGengFF (orange) or with our optimized forcefield (gray). The Y axis shows the energy (in kcal/mol) relative to the lowest-energy conformer.

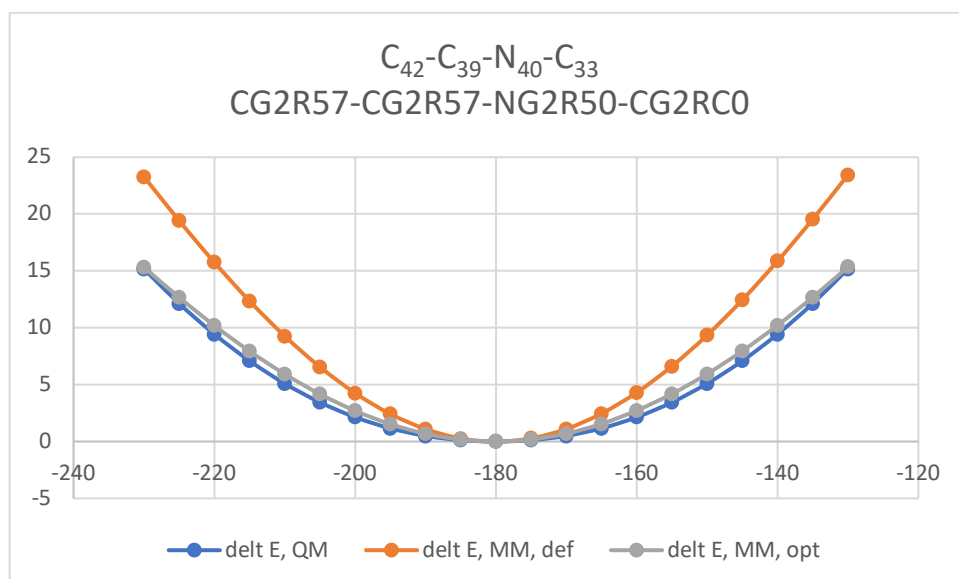

**Figure S11.** Potential-energy curve for the  $C_{42}C_{39}N_{40}C_{33}$  angle between  $-240^\circ$  and  $-120^\circ$ , calculated with MP2/6-31G(d) (blue) and with default CGengFF (orange) or with our optimized forcefield (gray). The Y axis shows the energy (in kcal/mol) relative to the lowest-energy conformer.

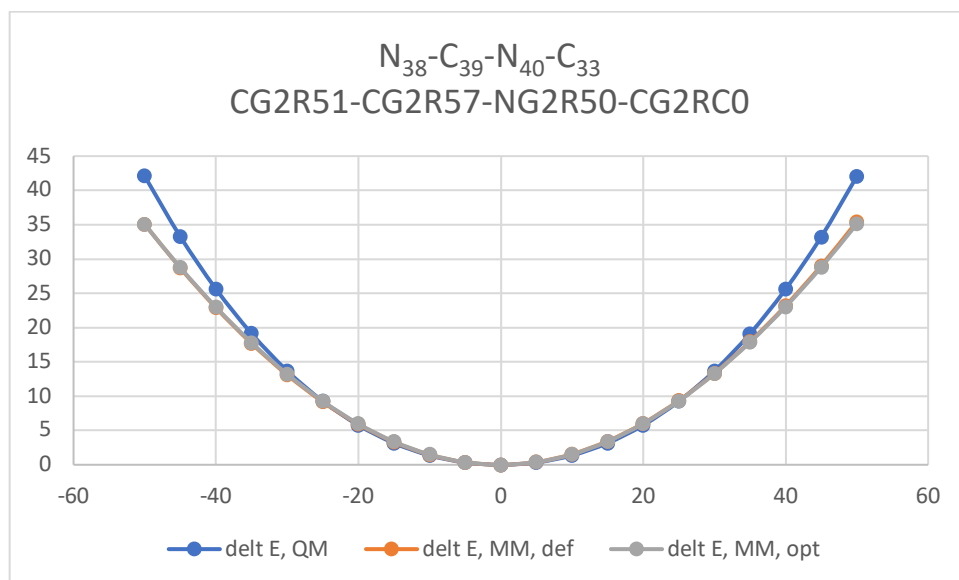

**Figure S12.** Potential-energy curve for the  $N_{38}C_{39}N_{40}C_{33}$  angle between  $-60^\circ$  and  $60^\circ$ , calculated with MP2/6-31G(d) (blue) and with default CGengFF (orange) or with our optimized forcefield (gray). The Y axis shows the energy (in kcal/mol) relative to the lowest-energy conformer.

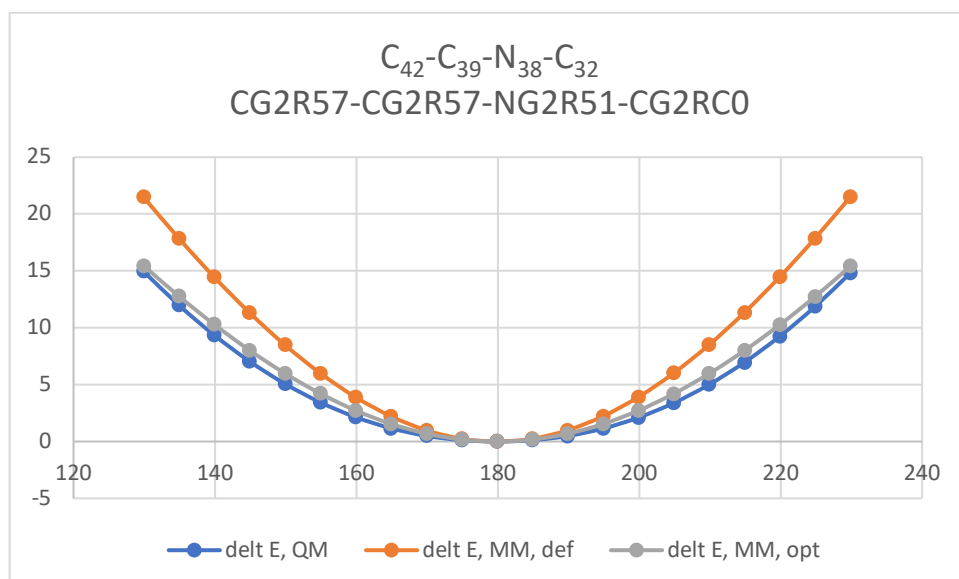

**Figure S13.** Potential-energy curve for the  $C_{42}C_{39}N_{38}C_{32}$  angle between  $120^\circ$  and  $240^\circ$ , calculated with MP2/6-31G(d) (blue) and with default CGengFF (orange) or with our optimized forcefield (gray). The Y axis shows the energy (in kcal/mol) relative to the lowest-energy conformer.



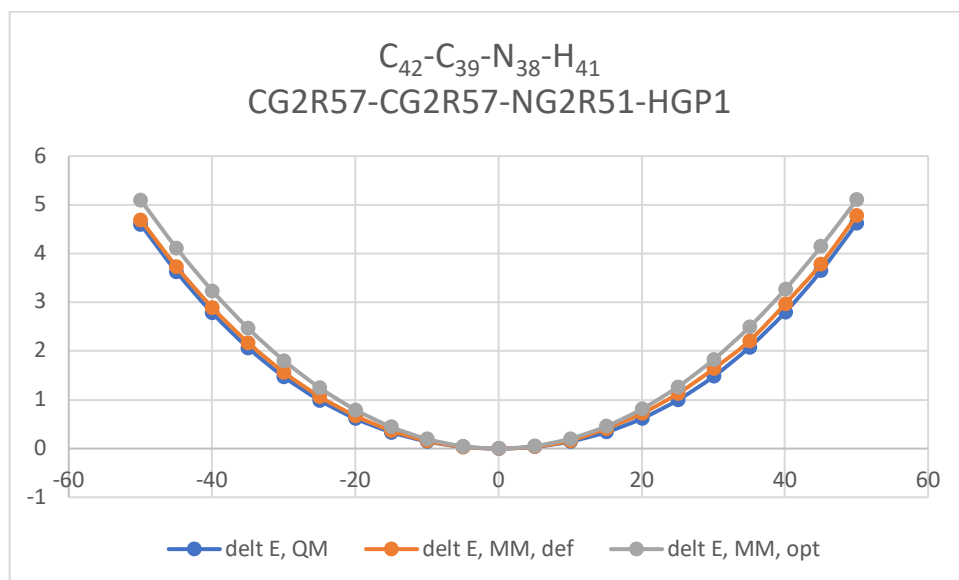

**Figure S14.** Potential-energy curve for the  $C_{42}C_{39}N_{38}H_{41}$  angle between  $-60^\circ$  and  $60^\circ$ , calculated with MP2/6-31G(d) (blue) and with default CGengFF (orange) or with our optimized forcefield (gray). The Y axis shows the energy (in kcal/mol) relative to the lowest-energy conformer.

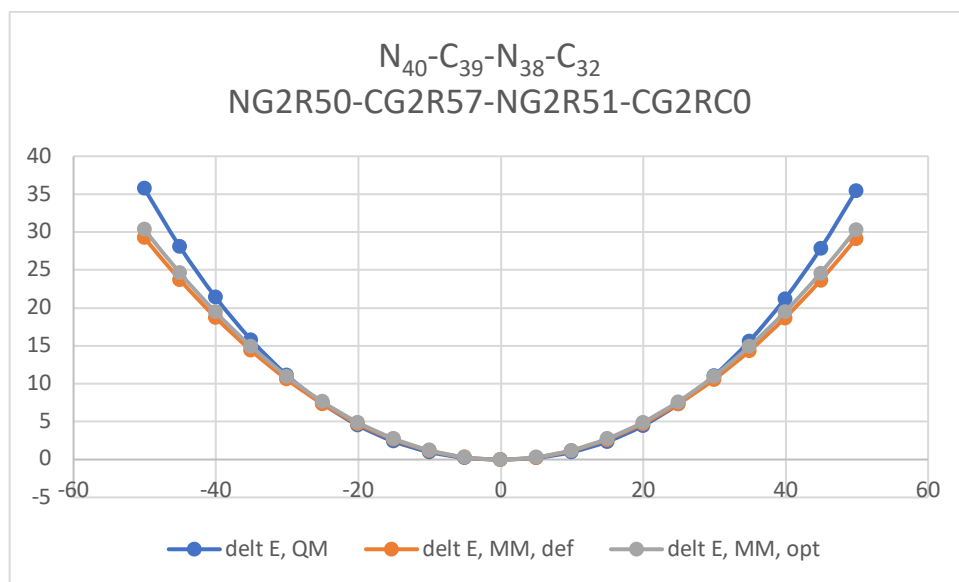

**Figure S15.** Potential-energy curve for the  $N_{40}C_{39}N_{38}C_{32}$  angle between  $-60^\circ$  and  $60^\circ$ , calculated with MP2/6-31G(d) (blue) and with default CGengFF (orange) or with our optimized forcefield (gray). The Y axis shows the energy (in kcal/mol) relative to the lowest-energy conformer.

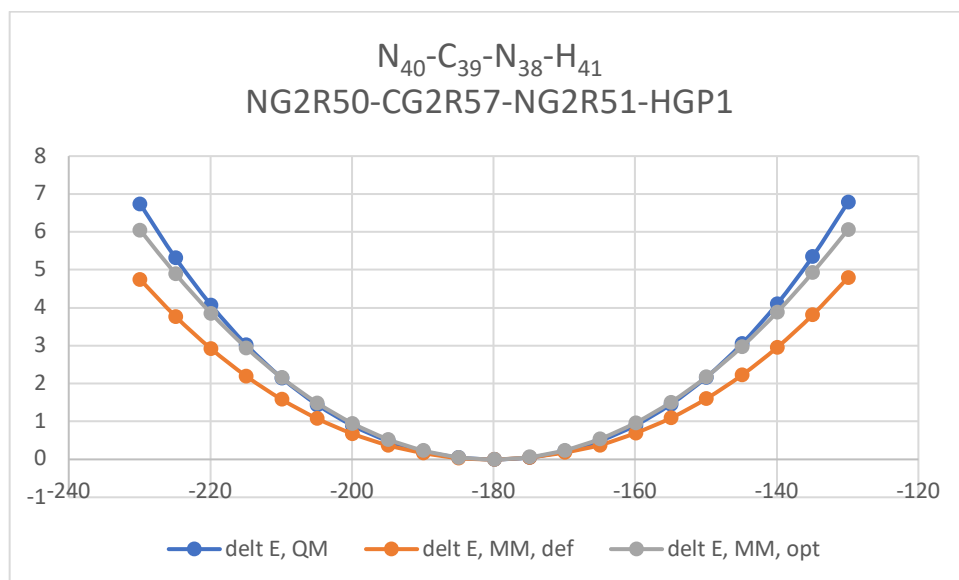

**Figure S16.** Potential-energy curve for the  $N_{40}C_{39}N_{38}H_{41}$  angle between  $-240^\circ$  and  $-120^\circ$ , calculated with MP2/6-31G(d) (blue) and with default CGengFF (orange) or with our optimized forcefield (gray). The Y axis shows the energy (in kcal/mol) relative to the lowest-energy conformer.

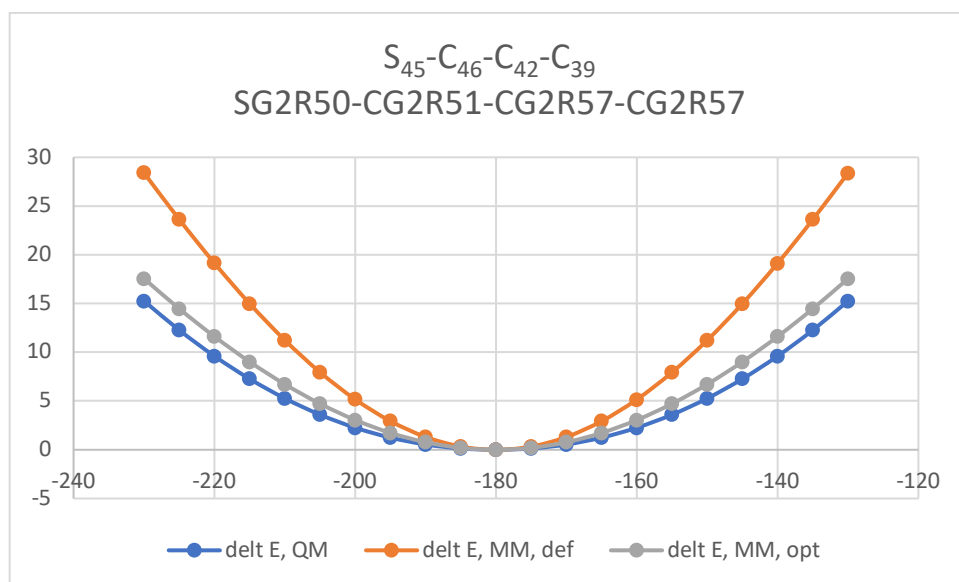

**Figure S17.** Potential-energy curve for the  $S_{45}C_{46}C_{42}C_{39}$  angle between  $-240^\circ$  and  $-120^\circ$ , calculated with MP2/6-31G(d) (blue) and with default CGengFF (orange) or with our optimized forcefield (gray) by scanning. The Y axis shows the energy (in kcal/mol) relative to the lowest-energy conformer.

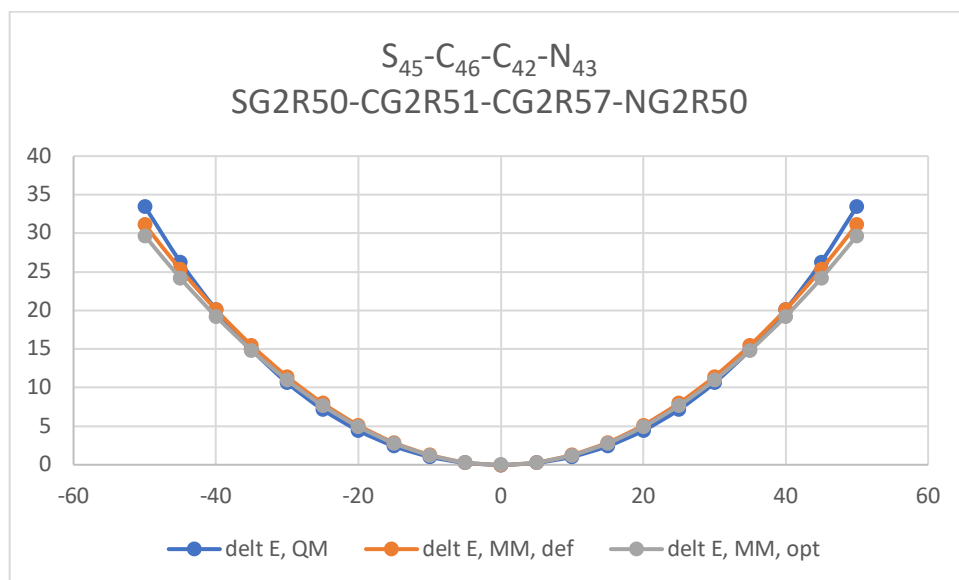

**Figure S18.** Potential-energy curves for the  $S_{45}C_{46}C_{42}N_{43}$  angle between  $-60^\circ$  and  $60^\circ$ , calculated with MP2/6-31G(d) (blue) and with default CGengFF (orange) or with our optimized forcefield (gray). The Y axis shows the energy (in kcal/mol) relative to the lowest-energy conformer.

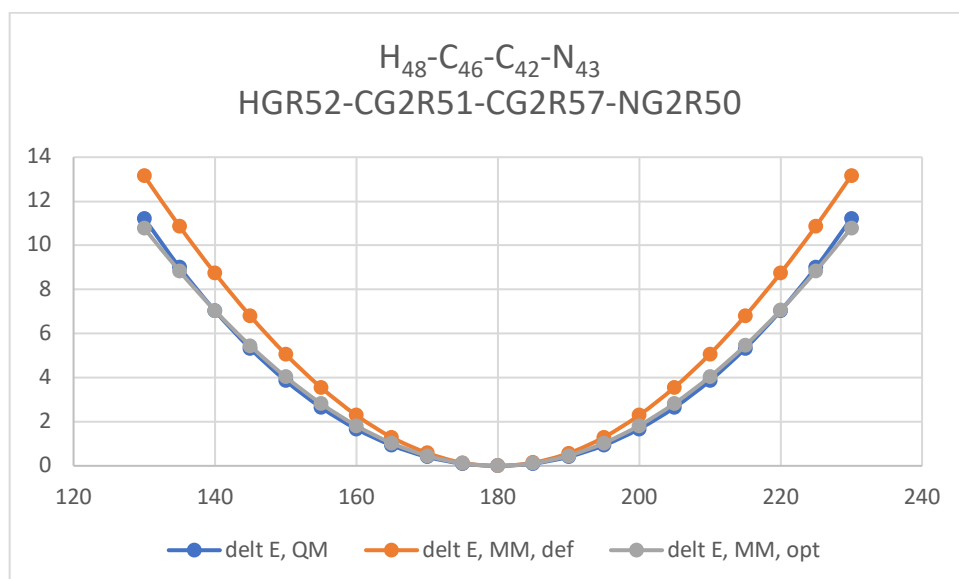

**Figure S19.** Potential-energy curve for the  $H_{48}C_{46}C_{42}N_{43}$  angle between  $120^\circ$  and  $240^\circ$ , calculated with MP2/6-31G(d) (blue) and with default CGengFF (orange) or with our optimized forcefield (gray). The Y axis shows the energy (in kcal/mol) relative to the lowest-energy conformer.

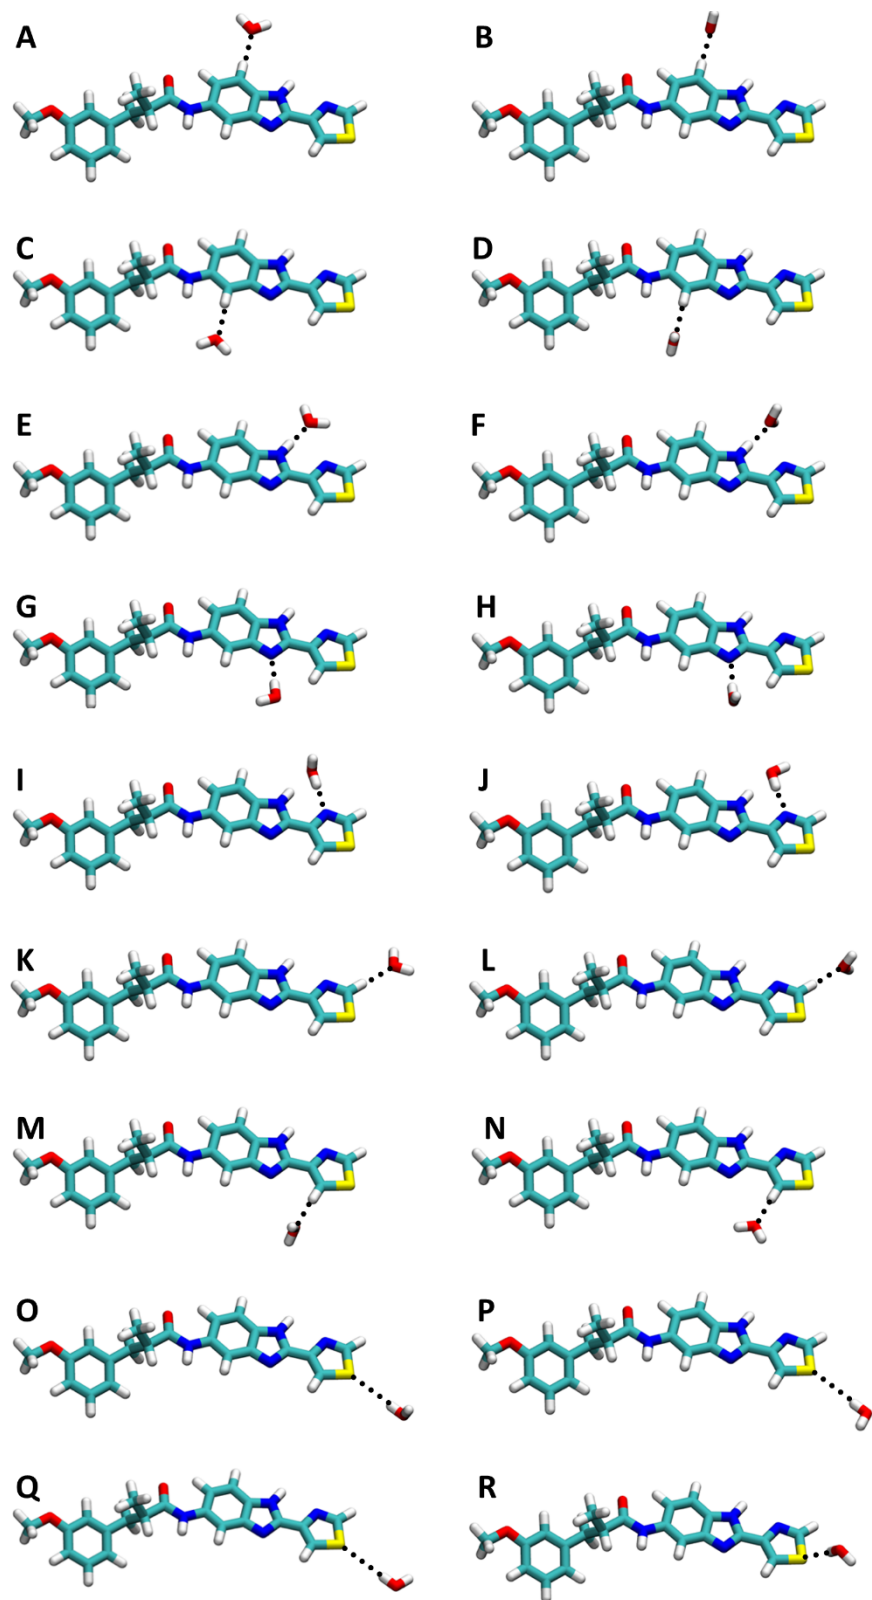

**Figure S20.** Ab-initio optimized geometries of RY785-water complexes used in the calibration of our molecular-mechanics forcefield for RY785.

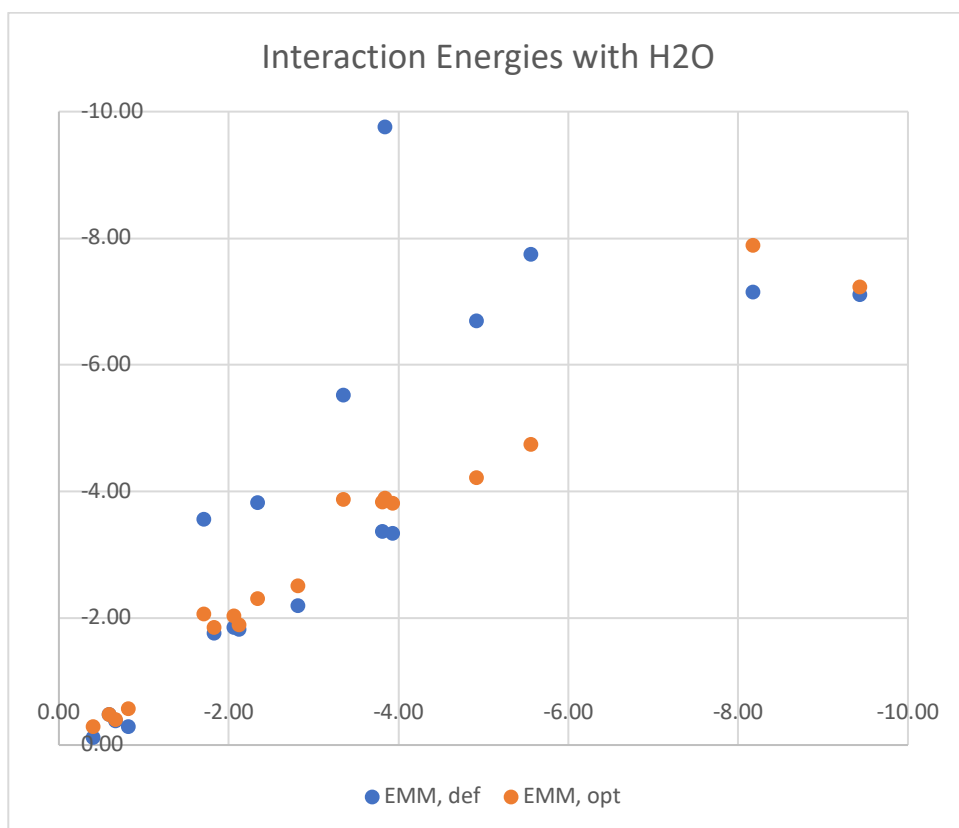

**Figure S21.** Interaction energies (in kcal/mol) for the RY785-water complexes shown in Fig. S20. QM data (Y-axis) are correlated with MM values calculated with default CGenFF (blue) and with our optimized forcefield (orange).

**Table S1.** Interaction distances (in Å) and Interaction energies (in kcal/mol) for the RY785-water complexes shown in Fig. S20. QM data are compared with MM values calculated with default CGenFF and with our optimized forcefield.

| Complex  | $E_{QM}$ | $r_{QM}$ | $E_{MM, def}$ | $r_{MM, def}$ | $E_{MM, opt}$ | $r_{MM, opt}$ |
|----------|----------|----------|---------------|---------------|---------------|---------------|
| <b>A</b> | -1.83    | 2.58     | -1.76         | 2.60          | -1.86         | 2.59          |
| <b>B</b> | -2.12    | 2.51     | -1.82         | 2.60          | -1.90         | 2.60          |
| <b>C</b> | -1.71    | 2.61     | -3.56         | 2.53          | -2.07         | 2.64          |
| <b>D</b> | -2.34    | 2.47     | -3.83         | 2.51          | -2.32         | 2.62          |
| <b>E</b> | -4.92    | 1.99     | -6.70         | 1.83          | -4.22         | 1.92          |
| <b>F</b> | -3.35    | 2.14     | -5.53         | 1.87          | -3.88         | 1.94          |
| <b>G</b> | -8.17    | 2.06     | -7.15         | 1.88          | -7.89         | 1.87          |
| <b>H</b> | -9.44    | 2.04     | -7.11         | 1.88          | -7.24         | 1.88          |
| <b>I</b> | -5.56    | 2.09     | -7.75         | 1.85          | -3.90         | 1.97          |
| <b>J</b> | -3.84    | 2.07     | -9.76         | 1.83          | -4.75         | 1.95          |
| <b>K</b> | -3.81    | 2.32     | -3.38         | 2.23          | -3.84         | 2.22          |
| <b>L</b> | -3.93    | 2.30     | -3.34         | 2.24          | -3.82         | 2.22          |
| <b>M</b> | -2.06    | 2.31     | -1.86         | 2.26          | -2.04         | 2.25          |
| <b>N</b> | -2.81    | 2.22     | -2.20         | 2.22          | -2.51         | 2.21          |
| <b>O</b> | -0.67    | 2.86     | -0.38         | 2.60          | -0.40         | 2.62          |
| <b>P</b> | -0.59    | 2.92     | -0.49         | 2.59          | -0.48         | 2.60          |
| <b>Q</b> | -0.40    | 2.94     | -0.12         | 2.66          | -0.29         | 2.67          |
| <b>R</b> | -0.82    | 2.80     | -0.29         | 2.58          | -0.37         | 2.57          |
